# Supplementary material for: Fat Body Cells Are Motile and Actively Migrate to Wounds to Drive Repair and Prevent Infection
Source: PubMed Central journal article supplement (PMC6113741; doi:10.1016/j.devcel.2018.01.026), 2018-02-26
Supplement: mmc1.pdf [file mmc1.pdf]

**Developmental Cell, Volume 44**

**Supplemental Information**

**Fat Body Cells Are Motile and Actively Migrate  
to Wounds to Drive Repair and Prevent Infection**

**Anna Franz, Will Wood, and Paul Martin**

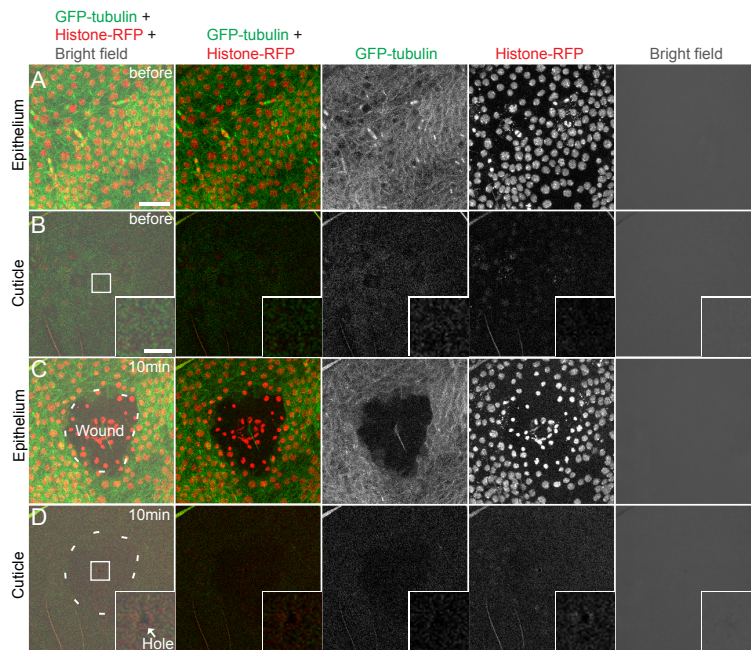

**Figure S1**  
**Morphology of a laser-induced epithelial wound labelled with Histone-RFP.**  
**Related to Figure 1**

(A-D) Microscopy images of a Z-stack projection restricted to the epithelium (A, C) or the cuticle (B, D) before (A, B) and 10 minutes after (C, D) making a laser-induced wound (outlined by white dotted line) in a *c564-Gal4+Ubi>GFP-tubulin+Ubq>Histone-RFP* pupa (Tubulin in green; nuclei in red; bright field in grey; magnified in the insets to show the hole in the cuticle).

Scale bars=20 $\mu$ m and 5 $\mu$ m (insets).

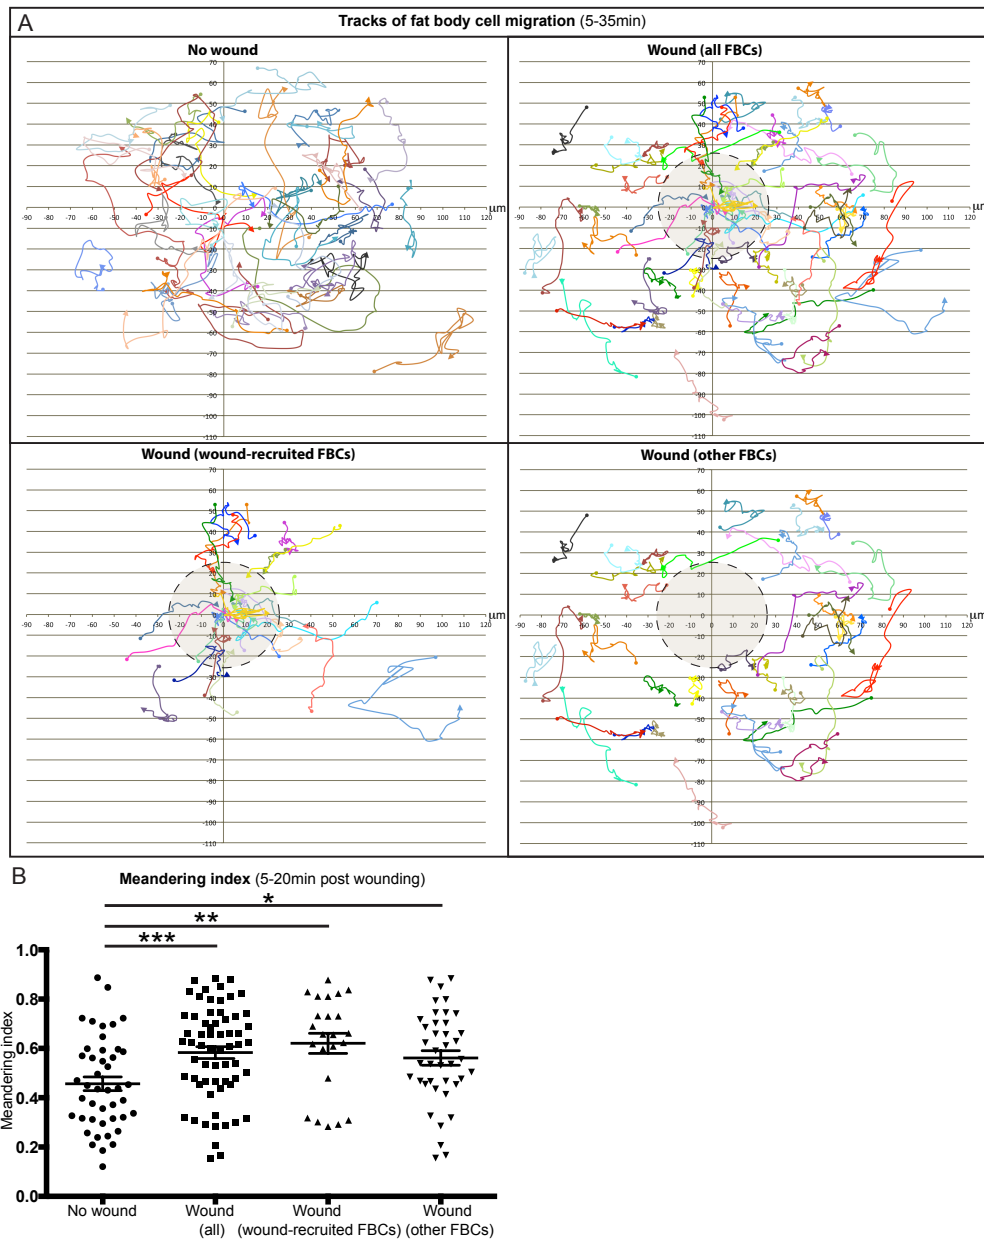

**Figure S2**

**Fat body cells migrate to wounds with a high meandering index.**

**Related to Figure 2**

(A-B) Migration tracks of FBCs (A; 5-35min) and quantification of meandering index (B, 5-20min) of FBC migration in *c564-Gal4+UAS-GFP+Ubq>Histone-RFP* unwounded (n=44 cells) or wounded pupae (tracks from all FBCs displayed on top right; from wound-recruited FBCs displayed on bottom left; and from FBCs that do not to interact with the wound area, displayed on bottom right; n=63, 23 and 40 cells, respectively; tracking performed in Z-projection mode). Mean±SEM. \* P<0.05, \*\* P<0.01, \*\*\* P<0.001 (Student's T-Test)

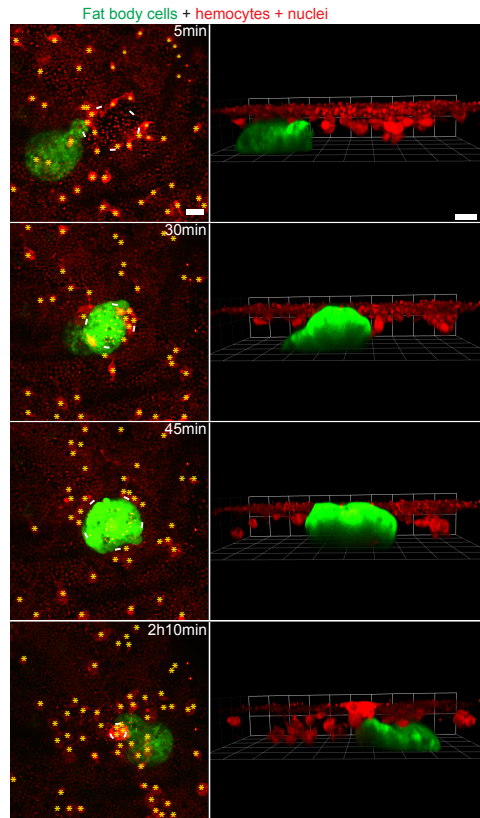

### Figure S3

#### Migration of a fat body cell and hemocytes to a wound.

#### Related to Figure 4

Still images from a timelapse movie showing hemocyte and FBC recruitment to a wound in a *c564-Gal4+UAS-GFP+srp>mCherry+Ubq>Histone-RFP* pupa (projection (left) and Z-plane (right) views; FBCs in green; hemocytes in red with yellow asterisks; epithelial nuclei in red; wound area containing bright red nuclei + outlined with white dotted line). Elapsed time is in top right corner. Scale bars=20 $\mu$ m. See also Movie S8.

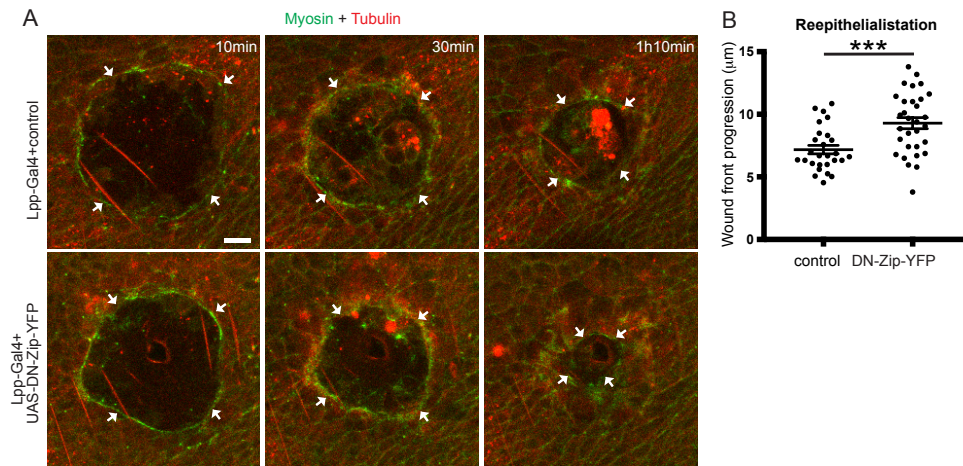

**Figure S4**

**Reepithelialisation is faster in the absence of fat body cells at wounds.**

**Related to Figure 3**

(A-B) Still images from a timelapse of reepithelialisation (A) and quantification of wound front progression (30-70min, B) in *sqh>Sqh-GFP+Ubq>RFP-tub+Lpp-Gal4+control* or *+UAS-DN-Zip-YFP* pupae (n=27 and 31, respectively; Myosin in green; Tubulin in red; wounds margins indicated with arrows). Mean±SEM. \*\*\*P<0.001 (Student's T-Test). Control=w67. Scale bar = 10µm.

**Table S1****Genotypes of pupae used in each experiment.****Related to Figures 1-5 and Supplementary Figures 1-4.**

| <b>Figure</b>  | <b>Genotype</b>                                                                             |
|----------------|---------------------------------------------------------------------------------------------|
| Fig 1A         | w67                                                                                         |
| Fig 1C-I       | c564-Gal4+UAS-GFP+Ubq>Histone-RFP                                                           |
| Fig 2A-D       | c564-Gal4+UAS-GFP+Ubq>Histone-RFP                                                           |
| Fig 3A and C   | Lpp-Gal4+UAS-GMA                                                                            |
| Fig 3D and E   | Lpp-Gal4+UAS-rd-Tomato+w67 and<br>Lpp-Gal4+UAS-rd-Tomato+UAS-DN-Zip-YFP                     |
| Fig 4A         | srp-Gal4+c564-Gal4+UAS-GFP+UAS-Red- Stinger                                                 |
| Fig 4B and C   | srp-Gal4+UAS-Reaper+tubGal80ts+srp-GMA+Ubq>Histone-RFP                                      |
| Fig 4D         | c564-Gal4+UAS-GFP+Ubq>Histone-RFP                                                           |
| Fig 5A         | c564-Gal4+UAS-GFP+Ubq>Histone-RFP                                                           |
| Fig 5B and C   | w67                                                                                         |
| Fig 5D         | c564-Gal4+UAS-GFP-Fascin+Ubq>RFP-tubulin                                                    |
| Figure 5 E     | c564-Gal4+UAS-GFP+Ubq>Histone-RFP                                                           |
| Figure 5 F     | Attacin>GFP+Lpp-Gal4+UAS-myr-td-Tomato                                                      |
| Fig S1A-D      | c564-Gal4+Ubi>GFP-tubulin+Ubq>Histone-RFP                                                   |
| Fig S2A and B  | c564-Gal4+UAS-GFP+Ubq>Histone-RFP                                                           |
| Fig S3         | c564-Gal4+UAS-GFP+srp>mCherry+Ubq>Histone-RFP                                               |
| Fig S4 A and B | sqh>Sqh-GFP+Ubq>RFP-tub+Lpp-Gal4+w67 and<br>sqh>Sqh-GFP+Ubq>RFP-tub+Lpp-Gal4+UAS-DN-Zip-YFP |
